# Supplementary material for: Analysis of the Expression of Neurotrophins and Their Receptors in Adult Zebrafish Kidney
Source: MDPI journal article supplement (doi:10.3390/vetsci9060296), 2022-06-15
Supplement: s1 [file s1]

## Adult zebrafish kidney (1 year old)

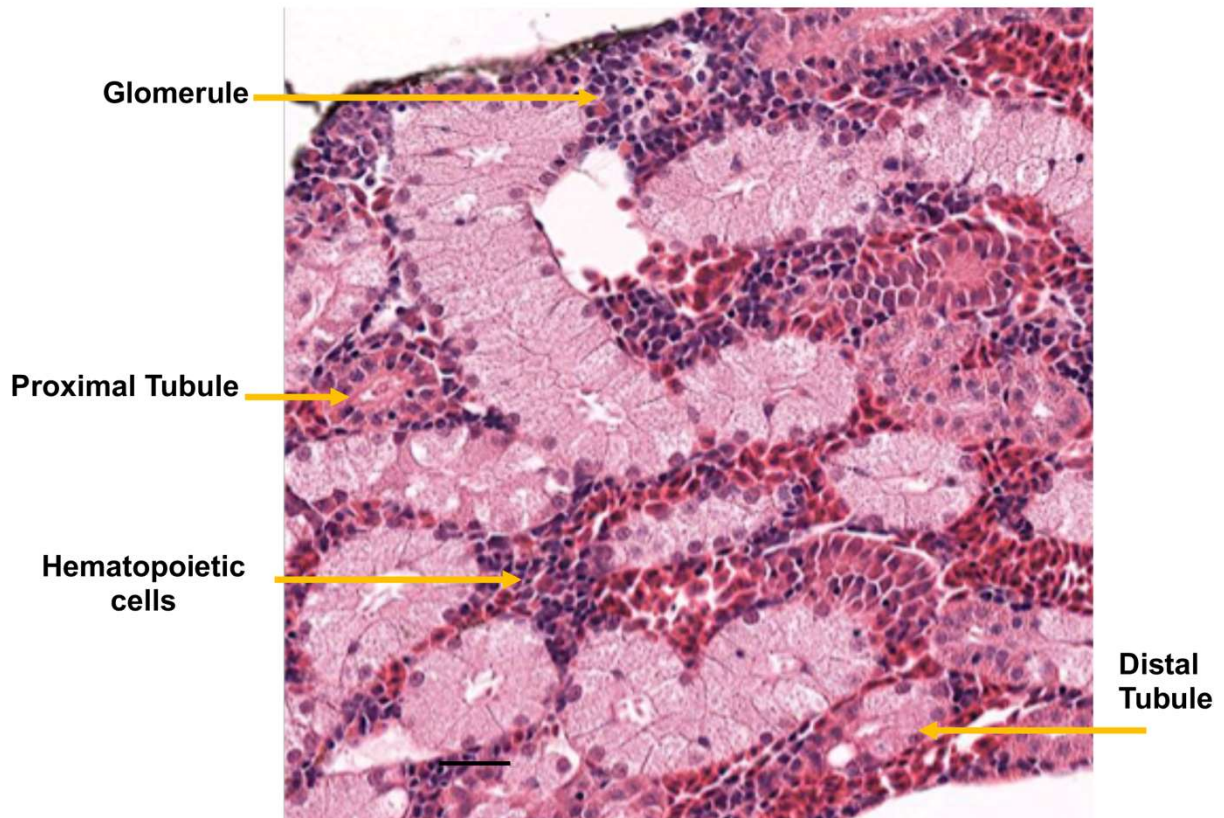

**Figure S1.** HE staining of zebrafish kidney available in zebrafish atlas. <https://bio-atlas.psu.edu/about.php>.

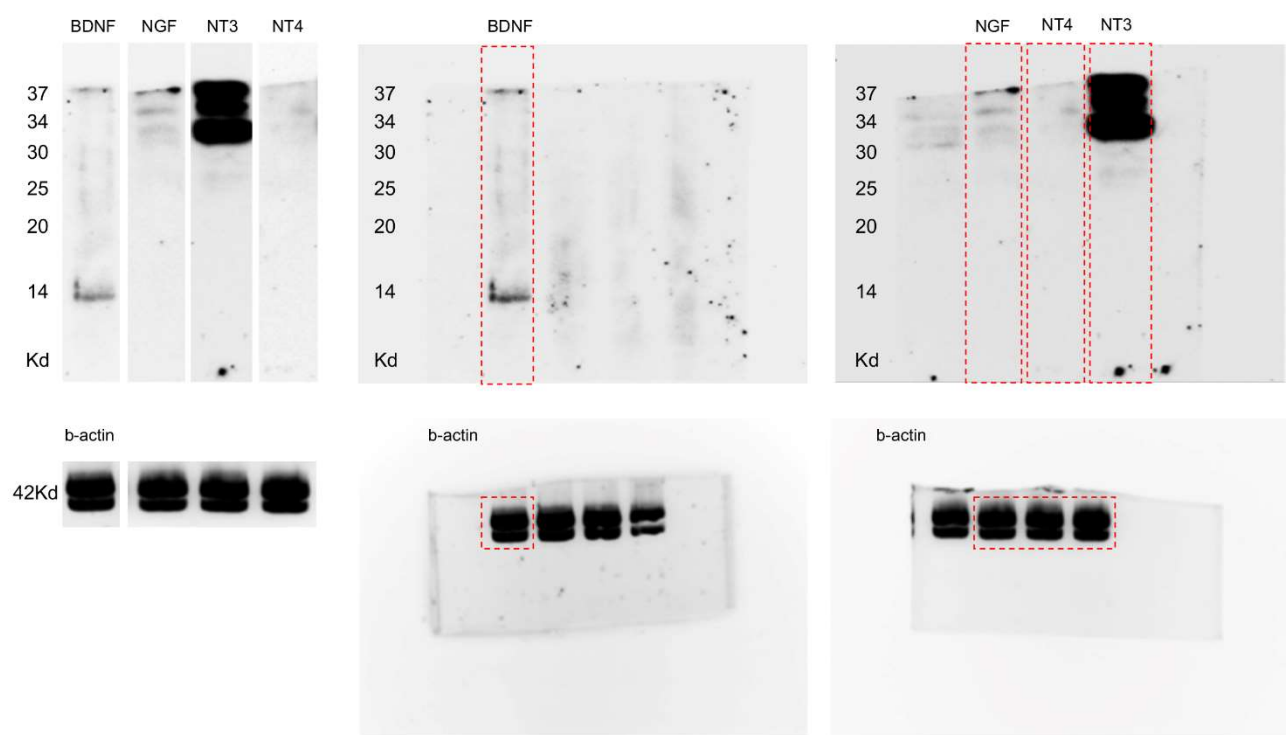

**Figure S2.** Original WB related to figure 4a.

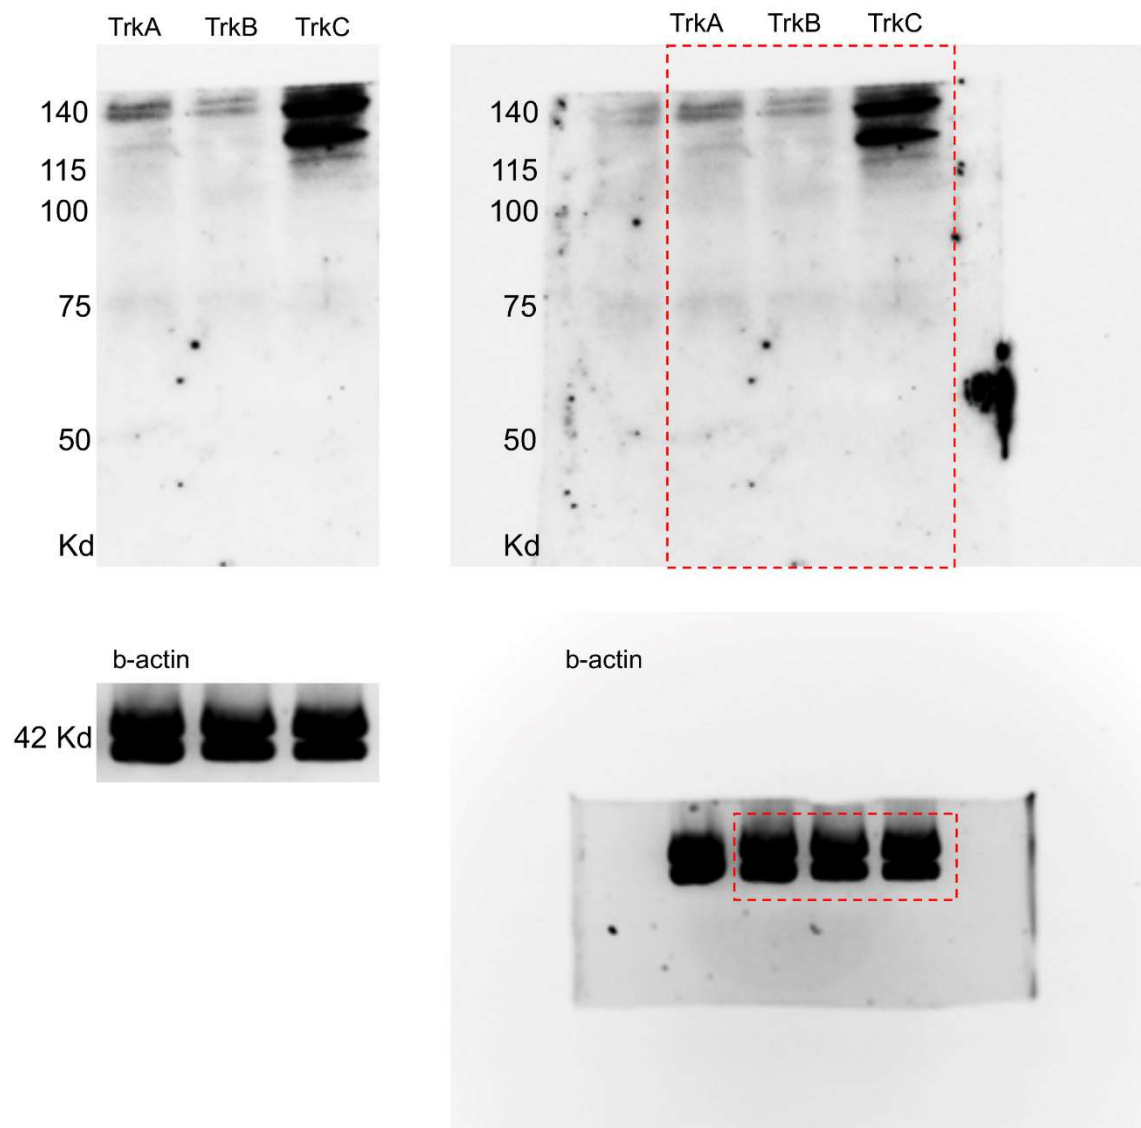

**Figure S3.** Original Western blotting related to figure 5b.
